# Supplementary material
Source: publisher site journal article supplement (https://www.dovepress.com/article/420830)
Supplement: Supplementary file 1 [file get_supplementary_file.php]

APPENDIX

Appendix 1. The first Delphi survey on the current and future guidelines for isoniazid-resistant tuberculosis

|  | | Strongly agree | Agree | Neutral | Disagree | Strongly disagree | Agreement rate* |
| --- | --- | --- | --- | --- | --- | --- | --- |
| Diagnosis | | | | | | | |
| Q1 | For all tuberculosis patients, it is essential to conduct molecular DST using the initial culture isolates and to determine the presence of genetic mutations responsible for resistance to INH and RIF. | 59 (90.8) | 4 (6.2) | 2 (3.1) | 0 (0.0) | 0 (0.0) | 96.9% |
| Q2 | In cases where the Xpert MTB/RIF assay shows RIF susceptibility, additional molecular DST is necessary to determine the presence of INH resistance | 40 (61.5) | 18 (27.7) | 7 (10.8) | 0 (0.0) | 0 (0.0) | 89.2% |
| Q3 | When molecular DST confirms the presence of INH resistance genetic mutations, it is essential to consider the type of mutation (*inhA* or *katG*) for interpretation. | 23 (35.4) | 24 (36.9) | 17 (26.2) | 1 (1.5) | 0 (0.0) | 72.3% |
| Q4 | When molecular DST confirms the presence of INH resistance genetic mutations, molecular DST for fluoroquinolones should be conducted for cases with confirmed INH resistance genetic mutations. | 34 (52.3) | 21 (32.3) | 7 (10.8) | 3 (4.6) | 0 (0.0) | 84.6% |
| Q5 | Regardless of the molecular DST results, all tuberculosis patients should undergo phenotypic DST using the initial culture isolates and confirm the presence of INH resistance. | 50 (76.9) | 13 (20.0) | 1 (1.5) | 1 (1.5) | 0 (0.0) | 96.9% |
| Q6 | In cases of discrepancy between the results of molecular and phenotypic DSTs, the phenotypic DST results should be prioritized. | 21 (32.3) | 19 (29.2) | 8 (12.3) | 15 (23.1) | 1 (1.5) | 62.5% |
| Treatment | | | | | | | |
| Q1 | Treatment regimens should be changed from the point of diagnosis of INH monoresistance in molecular and/or phenotypic DST. | 39 (60.0) | 21 (32.3) | 5 (7.7) | 0 (0.0) | 0 (0.0) | 92.3% |
| Q2 | It is recommended to treat INH monoresistant tuberculosis with a combination of RIF, EMB, PZA, and LFX for six months from the point of diagnosis. | 26 (40.0) | 31 (47.7) | 8 (12.3) | 0 (0.0) | 0 (0.0) | 87.7% |
| Q3 | The combination of anti-tuberculosis drugs for INH monoresistant tuberculosis treatment can be modified considering the following factors: 1) initial bacillary load, 2) extent of lesions, 3) culture conversion at two months, and 4) potential PZA side effects. | 21 (32.3) | 35 (53.8) | 7 (10.8) | 2 (3.1) | 0 (0.0) | 86.2% |
| Q4 | In cases of low severity INH monoresistant tuberculosis, levofloxacin may be omitted. | 2 (3.1) | 13 (20.0) | 15 (23.1) | 25 (38.5) | 10 (15.4) | 23.1% |
| Q5 | For patients with a high likelihood of PZA side effects, shortening the duration of PZA administration to two months and extending the overall treatment duration are considered positively. | 13 (20.0) | 39 (60.0) | 7 (10.8) | 6 (9.2) | 0 (0.0) | 80.0% |
| Q6 | If no side effects occur and medication adherence is good during INH monoresistant tuberculosis treatment, extending the total treatment duration beyond 12 months is deemed unnecessary. | 31 (47.7) | 31 (47.7) | 3 (4.6) | 0 (0.0) | 0 (0.0) | 95.4% |
| Q7 | For cases with low-concentration resistance to INH in phenotypic DST or when the *inhA* gene mutation is detected in molecular DST, high-dose INH administration can be considered. | 4 (6.2) | 23 (35.4) | 24 (36.9) | 14 (21.5) | 0 (0.0) | 41.5% |
| Q8 | When rifampin is discontinued due to side effects or other reasons during INH monoresistant tuberculosis treatment, anti-tuberculosis drugs should be selected according to multidrug-resistant tuberculosis criteria. | 18 (27.7) | 37 (56.9) | 6 (9.2) | 3 (4.6) | 1 (1.5) | 84.6% |
| Q9 | If INH monoresistant tuberculosis is diagnosed during six months of standard tuberculosis treatment, it is recommended to consult an expert with extensive experience in drug-resistant tuberculosis treatment. | 15 (23.1) | 25 (38.5) | 15 (23.1) | 9 (13.8) | 1 (1.5) | 61.5% |
| General | | | | | | | |
| Q1 | The current tuberculosis treatment guidelines (4th edition, 2020) require improvements in the section on INH monoresistant tuberculosis. | 6 (9.2) | 28 (43.1) | 23 (35.4) | 8 (12.3) | 0 (0.0) | 52.3% |
| Q2 | The current tuberculosis treatment guidelines (4th edition, 2020) sufficiently consider recently introduced diagnostic methods for INH monoresistant tuberculosis. | 1 (1.5) | 17 (26.2) | 29 (44.6) | 18 (27.7) | 0 (0.0) | 27.7% |
| Q3 | The current tuberculosis treatment guidelines (4th edition, 2020) sufficiently consider recently introduced treatment strategies for INH monoresistant tuberculosis. | 6 (9.2) | 24 (36.9) | 23 (35.4) | 11 (16.9) | 0 (0.0) | 46.9% |
| Q4 | The current tuberculosis treatment guidelines (4th edition, 2020) adequately reflect the clinical and socioeconomic characteristics of domestic patients. | 1 (1.5) | 19 (29.2) | 32 (49.2) | 13 (20.0) | 0 (0.0) | 30.8% |
| Q5 | The consensus reached through this Delphi survey should be reflected in the future revision of tuberculosis treatment guidelines in our country. | 26 (40.0) | 36 (55.4) | 3 (4.6) | 0 (0.0) | 0 (0.0) | 95.4% |
| * Agreement rate was defined as the percentage of responses with either “strongly agree” or “agree” | | | | | | | |

**Notes:**

**Abbreviations:** DST, drug susceptibility testing; INH, isoniazid; RIF, rifampin; EMB, ethambutol; PZA, pyrazinamide; LFX, levofloxacin.
